# Supplementary material for: Impact of emodin alone or in combination with ampicillin on methicillin-resistant Staphylococcus aureus biofilms in vitro
Source: Research Square preprint supplement (doi:10.21203/rs.3.rs-5030207/v1), 2025-04-23
Supplement: Supplementary file 1 [file 86e34416a464601a9e446292.docx]

**Supplementary Table 1. List of primers used for qPCR analysis.**

| Gene | Nucleotide sequence (5’→3’) | Reference |
| --- | --- | --- |
| *gyrB* | GGTGCTGGGCAAATACAAGT | (Schwartz*, et al.*, 2016) |
| TCCCACACTAAATGGTGCAA |
| *icaA* | GTCAGACACTTGCTGGCGCA | (Chen*, et al.*, 2020) |
| GAGCCCATCTCACGCGTTGC |
| *fnbpB* | AAGAAGCACCGAAAACTGTG | (Jo and Ahn, 2016) |
| TCTCTGCAACTGCTGTAACG |
| *clfA* | ATTGGCGTGGCTTCAGTGCT | (Jo and Ahn, 2016) |
| CGTTTCTTCCGTAGTTGCATTTG |
| *altA* | TGTCGAAGTATTTGCCGACTTCGC | (Jo and Ahn, 2016) |
| TGGAATCCTGCACATCCAGGAAC |

**Supplementary Figure 1. Effect of emodin on PIA formation and on extracellular proteins.** A-E) MRSA 19-10 was grown on Congo red medium and incubated with 1/8 to 1 MIC concentrations of emodin.

**Supplementary Figure 2. Effects of drugs on eDNA release and autolysis of MRSA strain 19-10. A-B)** The amount of eDNA in the cell-free supernatants from MRSA 19-10 biofilms treated with emodin alone or in combination with Amp was measured by agarose gel electrophoresis.

**References**

Chen, Q., Xie, S., Lou, X., Cheng, S., Liu, X., Zheng, W.*, et al.* (2020) Biofilm formation and prevalence of adhesion genes among Staphylococcus aureus isolates from different food sources, *Microbiologyopen* **9**: e00946.

Jo, A., and Ahn, J. (2016) Phenotypic and genotypic characterisation of multiple antibiotic-resistant Staphylococcus aureus exposed to subinhibitory levels of oxacillin and levofloxacin, *BMC Microbiol* **16**: 170.

Schwartz, K., Ganesan, M., Payne, D.E., Solomon, M.J., and Boles, B.R. (2016) Extracellular DNA facilitates the formation of functional amyloids in Staphylococcus aureus biofilms, *Mol Microbiol* **99**: 123-134.
